# Supplementary material
Source: MDPI journal article supplement (https://www.mdpi.com/2227-9717/8/5/590)
Supplement: s1 [file s1]

## Article

# A Novel Process of H<sub>2</sub>/CO<sub>2</sub> Membrane Separation of Shifted Syngas Coupled with Gasoil Hydrogenation

Weirong Huang <sup>1</sup>, Xiaobin Jiang <sup>1</sup>, Gaohong He <sup>1,2</sup>, Xuehua Ruan <sup>2</sup>, Bo Chen <sup>3</sup>,

Aazad Khan Nizamani <sup>1</sup>, Xiangcun Li <sup>1</sup>, Xuemei Wu <sup>1</sup> and Wu Xiao <sup>1,2,\*</sup>

<sup>1</sup> State Key Laboratory of Fine Chemicals, Engineering Laboratory for Petrochemical Energy-efficient Separation Technology of Liaoning Province, School of Chemical Engineering, Dalian University of Technology, Dalian 116024, China; hweirong@126.com (W.H.); xbjiang@dlut.edu.cn (X.J.); hgaohong@dlut.edu.cn (G.H.); aazadniz@mail.dlut.edu.cn (A.K.N.); lixiangcun@dlut.edu.cn (X.L.); xuemeiw@dlut.edu.cn (X.W.)

<sup>2</sup> State Key Laboratory of Fine Chemicals, Liaoning Province Engineering Research Center for VOC Control & Reclamation, School of Petroleum and Chemical Engineering, Dalian University of Technology at Panjin, Panjin 124221, China; xuehuaruan@dlut.edu.cn

<sup>3</sup> Sinopec Dalian Research Institute of Petroleum and Petrochemicals, Dalian 116024, China; Chenbo.dshy@sinopec.com

\* Correspondence: wuxiao@dlut.edu.cn;

Received: 3 April 2020; Accepted: 9 May 2020; Published: date

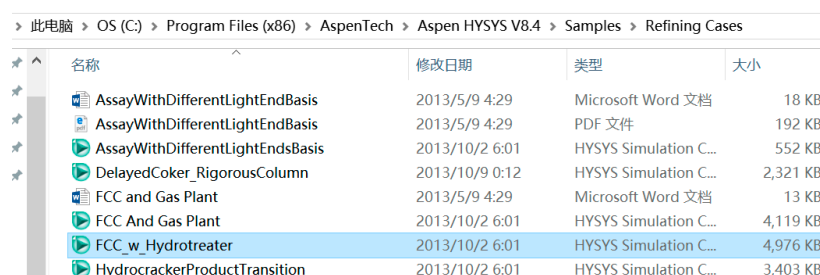

| 名称                               | 修改日期           | 类型                    | 大小       |
|----------------------------------|----------------|-----------------------|----------|
| AssayWithDifferentLightEndBasis  | 2013/5/9 4:29  | Microsoft Word 文档     | 18 KB    |
| AssayWithDifferentLightEndBasis  | 2013/5/9 4:29  | PDF 文件                | 192 KB   |
| AssayWithDifferentLightEndsBasis | 2013/10/2 6:01 | HYSYS Simulation C... | 552 KB   |
| DelayedCoker_RigorousColumn      | 2013/10/9 0:12 | HYSYS Simulation C... | 2,321 KB |
| FCC and Gas Plant                | 2013/5/9 4:29  | Microsoft Word 文档     | 13 KB    |
| FCC And Gas Plant                | 2013/10/2 6:01 | HYSYS Simulation C... | 4,119 KB |
| FCC_w_Hydrotreater               | 2013/10/2 6:01 | HYSYS Simulation C... | 4,976 KB |
| HydrocrackerProductTransition    | 2013/10/2 6:01 | HYSYS Simulation C... | 3,403 KB |

**Figure S1.** The file path of the gasoil hydrogenation reaction process we used in this work.

**Table S1.** The capital cost and operation cost of the CPGH (Conventional PSA Separation for H<sub>2</sub>/CO<sub>2</sub> of Shifted Syngas and Gasoil Hydrogenation) process (Excluding reactor part).

| Item                                      | Unit          | Value |
|-------------------------------------------|---------------|-------|
| Compressor equipment cost                 | million \$    | 21.30 |
| PSA equipment cost                        | million \$    | 41.36 |
| Other equipment <sup>1</sup> cost         | million \$    | 0.80  |
| Total investment cost                     | million \$    | 63.46 |
| PSA depreciation cost                     | million \$/yr | 2.36  |
| Other equipment <sup>1</sup> depreciation | million \$/yr | 9.70  |
| Electricity operation cost                | million \$/yr | 10.66 |
| Cold water operation cost                 | million \$/yr | 3.32  |
| Stream operation cost                     | million \$/yr | 7.12  |
| Total annual cost                         | million \$/yr | 33.16 |

<sup>1</sup> Other equipment includes heat exchangers, vessels, alkaline washing towers and mixers in process.

**Table S2.** Operational consumption of the CPGH process (Excluding reactor part).

| Item              | Number | Unit            | Value  |
|-------------------|--------|-----------------|--------|
| Compressor        | K-101  | kW              | 9870   |
|                   | K-102  | kW              | 5763   |
|                   | K-103  | kW              | 5700   |
| Heat Exchanger    | E-101  | kW              | 20,547 |
|                   | E-102  | kW              | 555    |
|                   | E-103  | kW              | 6334   |
|                   | E-104  | kW              | 30,444 |
|                   | E-105  | kW              | 44,903 |
| PSA               |        | million \$/year | 2.36   |
| Depreciation      |        | million \$/year | 9.70   |
| Total annual cost |        | million \$/year | 33.16  |

**Table S3.** Operational consumption of the NMGH process (Excluding reactor part).

| Item              | Number | Unit            | Value  |
|-------------------|--------|-----------------|--------|
| Compressor        | K-101  | kW              | 7200   |
|                   | K-102  | kW              | 3298   |
|                   | K-103  | kW              | 11,038 |
|                   | K-104  | kW              | 14754  |
| Heat Exchanger    | E-101  | kW              | 20,547 |
|                   | E-102  | kW              | 16,127 |
|                   | E-103  | kW              | 33,527 |
|                   | E-104  | kW              | 12,872 |
|                   | E-105  | kW              | 20,844 |
| Depreciation      |        | million \$/year | 4.20   |
| Total annual cost |        | million \$/year | 31.66  |

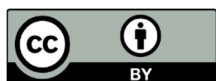

© 2020 by the authors. Submitted for possible open access publication under the terms and conditions of the Creative Commons Attribution (CC BY) license (<http://creativecommons.org/licenses/by/4.0/>).
